# Supplementary material for: Surface and tropospheric ozone over East Asia and Southeast Asia from observations: distributions, trends, and variability
Source: Copernicus journal article supplement (doi:10.5194/egusphere-2024-3756), 2025-01-21
Supplement: Supplementary file 1 [file egusphere-2024-3756-supplement.pdf]

## **Surface and tropospheric ozone over East Asia and Southeast Asia from observations: distributions, trends, and variability**

Ke Li<sup>1,\*,#</sup>, Rong Tan<sup>1,#</sup>, Wenhao Qiao<sup>1,#</sup>, Taegyung Lee<sup>2</sup>, Yufen Wang<sup>1</sup>, Danyuting Zhang<sup>1</sup>, Minglong Tang<sup>1</sup>, Wenqing Zhao<sup>1</sup>, Yixuan Gu<sup>1</sup>, Shaojia Fan<sup>3</sup>, Jinqiang Zhang<sup>4</sup>, Xiaopu Lyu<sup>5</sup>, Likun Xue<sup>6</sup>, Jianming Xu<sup>7,8</sup>, Zhiqiang Ma<sup>9,10</sup>, Mohd Talib Latif<sup>11</sup>, Teerachai Amnuaylojaroen<sup>12</sup>, Junsu Gil<sup>13</sup>, Mee-Hye Lee<sup>13</sup>, Juseon Bak<sup>14</sup>, Joowan Kim<sup>15</sup>, Hong Liao<sup>1</sup>, Yugo Kanaya<sup>16</sup>, Xiao Lu<sup>3</sup>, Tatsuya Nagashima<sup>17</sup>, Ja-Ho Koo<sup>2,\*</sup>

<sup>1</sup>Joint International Research Laboratory of Climate and Environment Change, Jiangsu Key Laboratory of Atmospheric Environment Monitoring and Pollution Control, Collaborative Innovation Center of Atmospheric Environment and Equipment Technology, School of Environmental Science and Engineering, Nanjing University of Information Science and Technology, Nanjing 210044, China

<sup>2</sup>Department of Atmospheric Sciences, Yonsei University, Seoul 03722, South Korea

<sup>3</sup>School of Atmospheric Sciences, Sun Yat-sen University, Zhuhai, Guangdong, China

<sup>4</sup>Key Laboratory of Middle Atmosphere and Global Environment Observation, Institute of Atmospheric Physics, Chinese Academy of Sciences, Beijing 100029, China

<sup>5</sup>Department of Geography, Faculty of Social Sciences, Hong Kong Baptist University, Hong Kong, China

<sup>6</sup>Environment Research Institute, Shandong University, Qingdao, China

<sup>7</sup>Shanghai Typhoon Institute, Shanghai Meteorological Service, Shanghai 200030, China

<sup>8</sup>Shanghai Key Laboratory of Meteorology and Health, Shanghai Meteorological Service, Shanghai 200030, China

<sup>9</sup>Institute of Urban Meteorology, China Meteorological Administration, Beijing 100089, China

<sup>10</sup>Beijing Shangdianzi Regional Atmosphere Watch Station, Beijing 101507, China

<sup>11</sup>Department of Earth Sciences and Environment, Faculty of Science and Technology, Universiti Kebangsaan Malaysia, Bangi, Selangor, Malaysia

<sup>12</sup>Atmospheric Pollution and Climate Change Research Units, School of Energy and Environment, University of Phayao, Phayao 56000, Thailand

<sup>13</sup>Department of Earth and Environment Sciences, Korea University, Seoul 02841, South Korea

<sup>14</sup>Institute of Environmental Studies, Pusan National University, Busan 46241, Republic of Korea

<sup>15</sup>Department of Atmospheric Sciences, Kongju National University, Kongju 32588, South Korea

<sup>16</sup>Japan Agency for Marine-Earth Science and Technology, Yokohama, Japan

<sup>17</sup>National Institute for Environmental Studies, Tsukuba 305-8506, Japan

<sup>#</sup>These authors contributed equally

\*Correspondence to: Ke Li (keli@nuist.edu.cn) and Ja-Ho Koo (zach45@yonsei.ac.kr)

**Table S1.** The observed ozone trends in 11 long-term measurements over China. The \* denotes  $p$ -value less than 0.1, and \*\* denotes  $p$ -value less than 0.01. The  $p$ -value is also given in the bracket.

| Site                | Metric   | Spring            | Summer            | Autumn            | Winter            |
|---------------------|----------|-------------------|-------------------|-------------------|-------------------|
| <b>Mt. Waliguan</b> | MDA8     | 0.56*<br>(0.06)   | 0.37<br>(0.14)    | 0.33<br>(0.26)    | 0.15<br>(0.27)    |
|                     | 24h mean | 0.51*<br>(0.07)   | 0.32<br>(0.19)    | 0.32<br>(0.20)    | 0.15<br>(0.23)    |
| <b>Shangdianzi</b>  | MDA8     | 0.85*<br>(0.09)   | 0.73<br>(0.12)    | 0.26<br>(0.58)    | 0.32*<br>(0.07)   |
|                     | 24h mean | 0.55<br>(0.11)    | 0.64*<br>(0.09)   | 0.05<br>(0.88)    | 0.23<br>(0.17)    |
| <b>Lin'an</b>       | MDA8     | -0.16<br>(0.82)   | 0.06<br>(0.88)    | -0.55<br>(0.40)   | 0.52<br>(0.18)    |
|                     | 24h mean | -0.27<br>(0.60)   | 0.02<br>(0.94)    | -0.31<br>(0.50)   | 0.44<br>(0.19)    |
| <b>Longfengshan</b> | MDA8     | -1.67**<br>(0.00) | -0.25<br>(0.67)   | 0.35<br>(0.44)    | -1.24**<br>(0.00) |
|                     | 24h mean | -1.41**<br>(0.00) | -0.24<br>(0.57)   | 0.24<br>(0.43)    | -0.95**<br>(0.00) |
| <b>Xianggelila</b>  | MDA8     | 0.00<br>(0.99)    | 0.26<br>(0.59)    | 1.23**<br>(0.03)  | 0.17<br>(0.55)    |
|                     | 24h mean | -0.20<br>(0.54)   | 0.06<br>(0.89)    | 0.53<br>(0.23)    | 0.00<br>(0.99)    |
| <b>Akedala</b>      | MDA8     | -1.46**<br>(0.01) | -3.65**<br>(0.00) | -1.73<br>(0.1)    | -0.88<br>(0.27)   |
|                     | 24h mean | -1.84**<br>(0.00) | -2.90**<br>(0.00) | -1.68**<br>(0.01) | -0.44<br>(0.59)   |
| <b>Mt. Tai</b>      | MDA8     | N.A.              | 0.83<br>(0.35)    | N.A.              | N.A.              |
|                     | 24h mean | N.A.              | 0.76<br>(0.35)    | N.A.              | N.A.              |
| <b>Gucheng</b>      | MDA8     | 0.89<br>(0.38)    | 0.89<br>(0.20)    | -0.23<br>(0.82)   | -0.12<br>(0.75)   |
|                     | 24h mean | 0.26<br>(0.68)    | 0.46<br>(0.35)    | -0.31<br>(0.52)   | -0.20<br>(0.32)   |
| <b>Xunjuahui</b>    | MDA8     | 1.61**<br>(0.00)  | 1.02**<br>(0.02)  | 1.26**<br>(0.00)  | 1.48**<br>(0.00)  |
|                     | 24h mean | 1.47**<br>(0.00)  | 1.04**<br>(0.00)  | 1.30**<br>(0.00)  | 1.20**<br>(0.00)  |
| <b>Guangzhou</b>    | 24h mean | 0.48<br>(0.24)    | 0.59**<br>(0.01)  | -0.37<br>(0.29)   | 0.29<br>(0.23)    |
| <b>Hong Kong</b>    | 24h mean | 0.41*<br>(0.05)   | 0.45**<br>(0.01)  | -0.19<br>(0.52)   | 0.04<br>(0.82)    |

**Table S2.** The national air quality standard for MDA8 and MDA1 ozone.

| Country     | MDA1 ozone<br>( $\mu\text{g m}^{-3}$ ) | MDA8 ozone<br>( $\mu\text{g m}^{-3}$ ) | Reference                                                                                                                                                                                                                                                                                                                                                                                                                                |
|-------------|----------------------------------------|----------------------------------------|------------------------------------------------------------------------------------------------------------------------------------------------------------------------------------------------------------------------------------------------------------------------------------------------------------------------------------------------------------------------------------------------------------------------------------------|
| China       | 160                                    | 100                                    | <a href="https://www.mee.gov.cn/ywgz/fgbz/bz/bzwb/dqhjbh/dqhjzlbz/201203/t20120302_224165.shtml">https://www.mee.gov.cn/ywgz/fgbz/bz/bzwb/dqhjbh/dqhjzlbz/201203/t20120302_224165.shtml</a>                                                                                                                                                                                                                                              |
| Japan       | 120                                    |                                        | <a href="https://www.env.go.jp/air/kijun/index.html">https://www.env.go.jp/air/kijun/index.html</a>                                                                                                                                                                                                                                                                                                                                      |
| South Korea | 200                                    | 120                                    | <a href="https://www.airkorea.or.kr/eng/contents/contentView/?pMENU_NO=160&amp;cntnts_no=16">https://www.airkorea.or.kr/eng/contents/contentView/?pMENU_NO=160&amp;cntnts_no=16</a>                                                                                                                                                                                                                                                      |
| Singapore   | N.A.                                   | 120                                    | <a href="https://www.nea.gov.sg/our-services/pollution-control/air-pollution/air-quality">https://www.nea.gov.sg/our-services/pollution-control/air-pollution/air-quality</a><br><a href="https://www.myanmar-responsiblebusiness.org/pdf/2015-12-29-National-Environmental-Quality_Emission_Guidelines_en.pdf">https://www.myanmar-responsiblebusiness.org/pdf/2015-12-29-National-Environmental-Quality_Emission_Guidelines_en.pdf</a> |
| Myanmar     | N.A.                                   | 100                                    |                                                                                                                                                                                                                                                                                                                                                                                                                                          |
| Indonesia   | 235                                    | N.A.                                   |                                                                                                                                                                                                                                                                                                                                                                                                                                          |
| Vietnam     | 200                                    | 120                                    |                                                                                                                                                                                                                                                                                                                                                                                                                                          |
| Thailand    | 200                                    | 140                                    | <a href="http://www.brigc.net/zcyj/bgxz/2021/202112/P020211217480996607271.pdf">http://www.brigc.net/zcyj/bgxz/2021/202112/P020211217480996607271.pdf</a>                                                                                                                                                                                                                                                                                |
| Laos        | 200                                    | 100                                    |                                                                                                                                                                                                                                                                                                                                                                                                                                          |
| Malaysia    | 180                                    | N.A.                                   |                                                                                                                                                                                                                                                                                                                                                                                                                                          |
| Cambodia    | 200                                    | N.A.                                   | <a href="http://www.epiac.org/uploadfile/2021/0820/20210820032403319.pdf">http://www.epiac.org/uploadfile/2021/0820/20210820032403319.pdf</a>                                                                                                                                                                                                                                                                                            |
| Philippine  | N.A.                                   | 60                                     | He et al., 2024                                                                                                                                                                                                                                                                                                                                                                                                                          |

**Table S3.** Summary of ozonesonde sites used in this study.

| Site ID | GAW platform ID | Site name     | Country   | Latitude | Longitude |
|---------|-----------------|---------------|-----------|----------|-----------|
| SAP     | 12              | Sapporo       | Japan     | 43.06 °N | 141.33 °E |
| TKB     | 14              | Tsukuba       | Japan     | 36.05 °N | 140.13 °E |
| POH     | 332             | Pohang        | Korea     | 36.03 °N | 129.38 °E |
| KAG     | 7               | Kagoshima     | Japan     | 31.55 °N | 130.55 °E |
| NAH     | 190             | Naha          | Japan     | 26.20 °N | 127.68 °E |
| HKO     | 344             | King's park   | China     | 22.31 °N | 114.17 °E |
| AAR     | 330             | Hanoi         | Vietnam   | 21.02 °N | 105.80 °E |
| SEP     | 443             | Selangor Jaya | Malaysia  | 2.73 °N  | 101.70 °E |
| WAT     | 437             | WatuKosek     | Indonesia | 7.5 °S   | 112.65 °E |
| Beijing | N.A.            | Beijing       | China     | 39.8 °N  | 116.47° E |

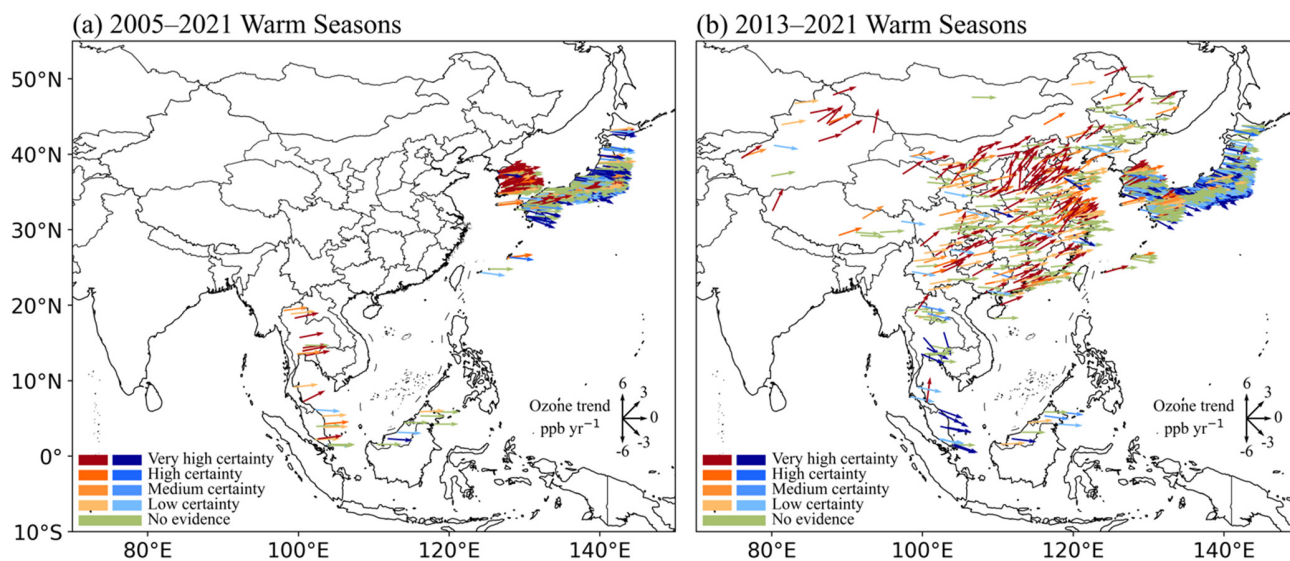

**Figure S1.** The observed ozone trends during warm seasons (April to September) over 2005-2021 (left) and 2013-2021 (right) over East Asia and Southeast Asia. It is noted that national surface ozone data in China is not available before 2013.

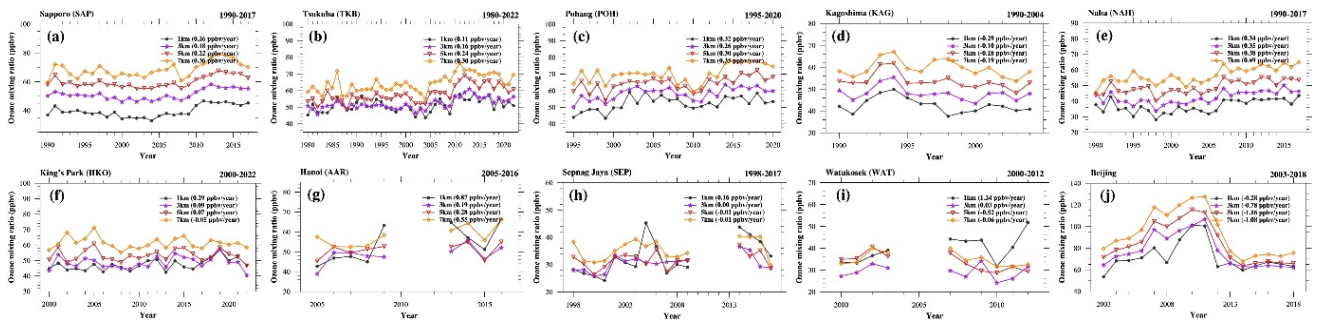

**Figure S2.** Annual mean ozone variation of 1-km (black), 3-km (purple), 5-km (red), and 7-km (orange) altitudes at (a) Sapporo (SAP), (b) Tsukuba (TKB), (c) Pohang (POH), (d) Kagoshima (KAG), (e) Naha (NAH), (f) King's park (HKO), (g) Hanoi (AAR), (h) Sepang Jaya, (i) Watukosek, and (j) Beijing site: March-April-May (MAM, red), June-July-August (JJA, blue), September-October-November (SON, green), and December-January-February (DJF).

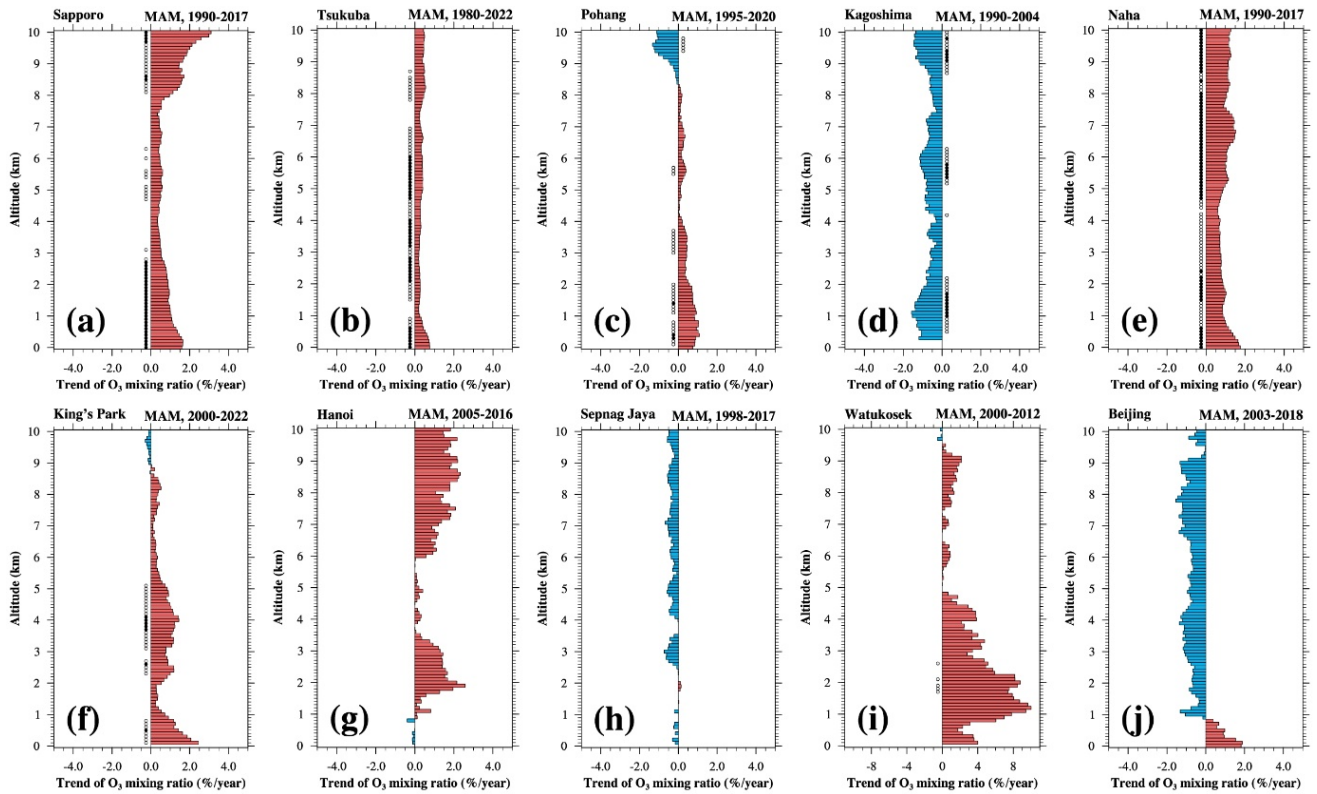

**Figure S3.** Long-term trends of spring (MAM) mean ozone per 100-m range from 0 to 10 km altitude at (a) Sapporo (SAP), (b) Tsukuba (TKB), (c) Pohang (POH), (d) Kagoshima (KAG), (e) Naha (NAH), (f) King's park (HKO), (g) Hanoi (AAR), (h) Sepang Jaya, (i) Watukosek, and (j) Beijing site. Orange color means increasing, and blue color means decreasing trend. Black dot indicates that the trend is statistically significant having a p-value smaller than 0.01, and white dot does that the trend is statistically significant having a p-value between 0.01 and 0.05.

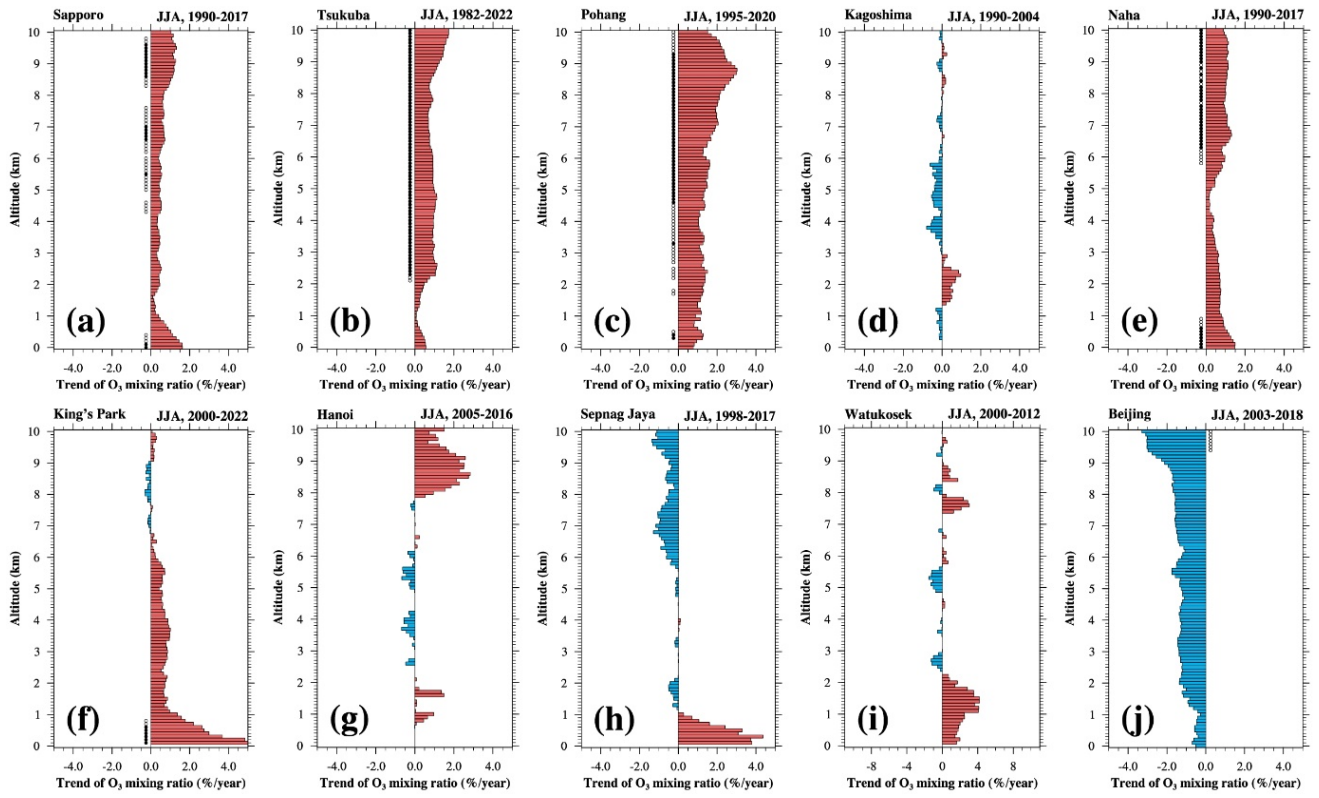

Figure S4. Same as Figure S3 but for long-term trends of summer (JJA) mean ozone.



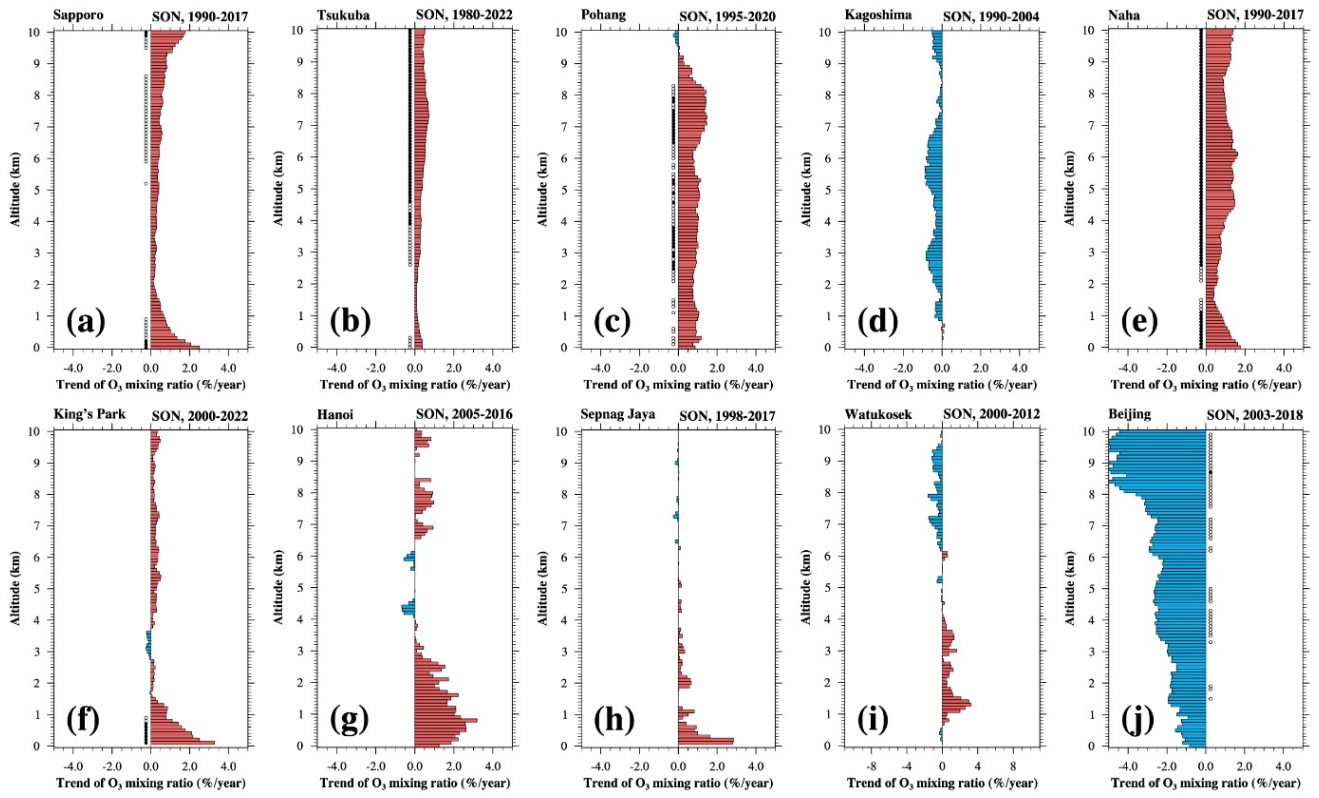

Figure S5. Same as Figure S3 but for long-term trends of autumn (SON) mean ozone.

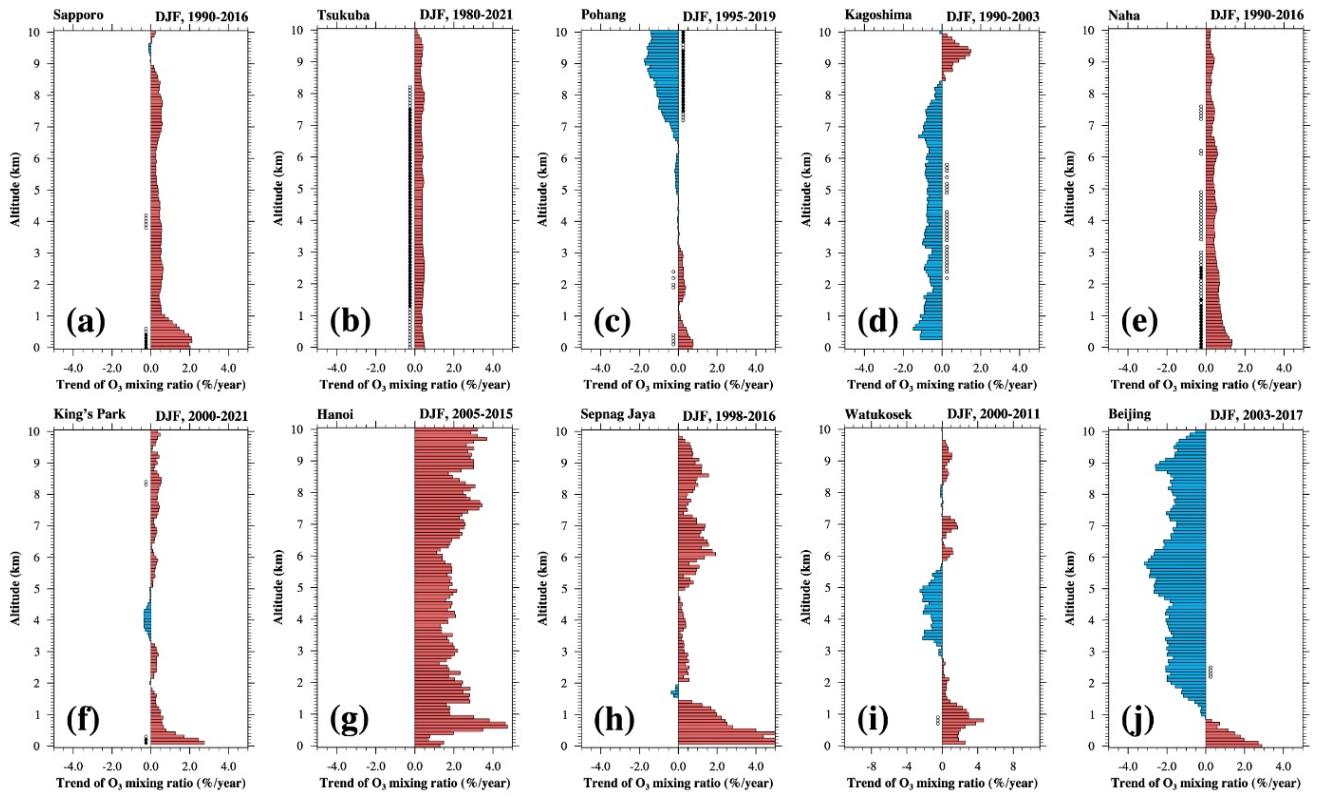

Figure S6. Same as Figure S3 but for long-term trends of winter (DJF) mean ozone.

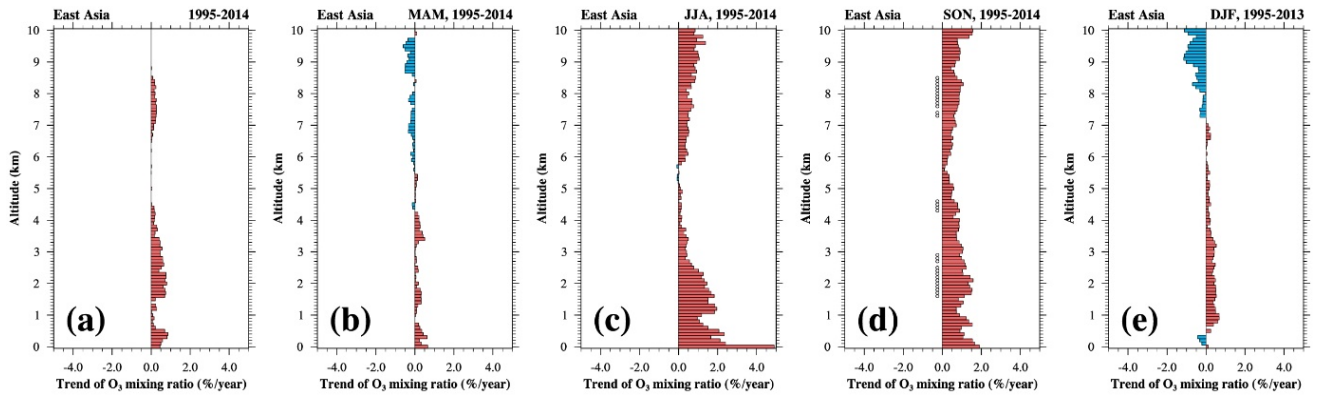

**Figure S7.** Long-term trends of (a) annual, (b) MAM, (c) JJA, (d) SON, and (e) DJF mean ozone in Northeast Asia obtained from the IAGOS aircraft measurement. The period of used data is from 1995 to 2014.

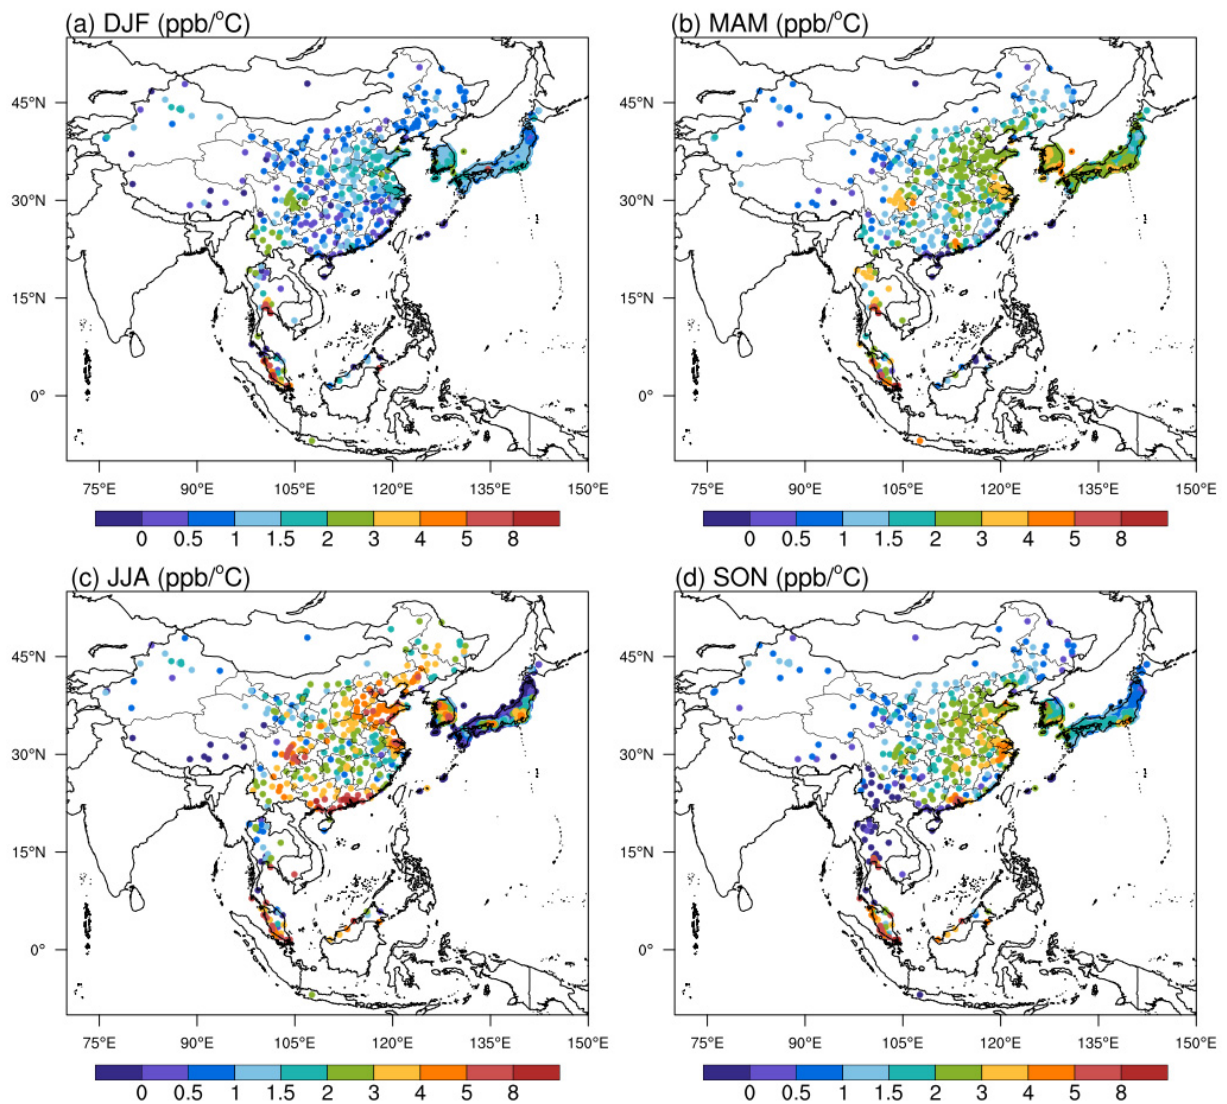

**Figure S8.** The observed 95th percentile regression slope (ppb °C<sup>-1</sup>) between daily surface MDA8 ozone and daily maximum 2-m air temperature (Tmax) in (a) DJF, (b) MAM, (c) JJA, and (d) SON averaged over 2017-2021.

## Reference

He, J., Wang, Z., Guo, M., Gu, Y., Jiang, M., Hu J., Wu X., and Chai, F.: Research on global ambient air quality standards and future prospects of China's standards[J]. *Res. Environ. Sci. (in Chinese)*, 37(9), 1897-1910, <https://doi.org/10.13198/j.issn.1001-6929.2024.07.07>, 2024.
